# Supplementary material for: Hydrogel Delivery System Containing Calendulae flos Lyophilized Extract with Chitosan as a Supporting Strategy for Wound Healing Applications
Source: PubMed Central journal article supplement (PMC7407229; doi:10.3390/pharmaceutics12070634), 2020-07-07
Supplement: pharmaceutics-12-00634-s001.pdf [file pharmaceutics-12-00634-s001.pdf]

# Supplementary Materials: Hydrogel Delivery System Containing *Calendulae flos* Lyophilized Extract with Chitosan as a Supporting Strategy for Wound Healing Applications

Justyna Chanaj-Kaczmarek, Magdalena Paczkowska, Tomasz Osmalek, Barbara Kaproń, Tomasz Plech, Daria Szymanowska, Marta Karaźniewicz-Łada, Joanna Kobus-Cisowska and Judyta Cielecka-Piontek

**Table S1.** Statistical assay of linear plots of the chlorogenic acid and the narcissin, determined by the UHPLC-DAD method.

| Parameter                                                                 | Chlorogenic Acid             |      | Narcissin                     |      |
|---------------------------------------------------------------------------|------------------------------|------|-------------------------------|------|
| Linearity: $y = ax + b$                                                   |                              |      |                               |      |
| $a \pm S_a$                                                               | 0.3963 $\pm$ 0.0025          |      | 0.1235 $\pm$ 0.0050           |      |
| $b \pm S_b$                                                               | Insignificant                |      | insignificant                 |      |
| correlation coefficient (r)                                               | 0.9999                       |      | 0.9994                        |      |
| Limit of detection (LOD):<br>LOD = 3 SD/a ( $\mu\text{g mL}^{-1}$ )       | 0.63                         |      | 10.64                         |      |
| Limit of quantification (LOQ):<br>LOQ = 10 SD/a ( $\mu\text{g mL}^{-1}$ ) | 1.92                         |      | 32.26                         |      |
| Range of linearity ( $\mu\text{g mL}^{-1}$ )                              | 10–100                       |      | 10–250                        |      |
| Precision, RSD                                                            |                              |      |                               |      |
|                                                                           | 20 ( $\mu\text{g mL}^{-1}$ ) | 1.42 | 100 ( $\mu\text{g mL}^{-1}$ ) | 0.41 |
|                                                                           | 40 ( $\mu\text{g mL}^{-1}$ ) | 0.56 | 150 ( $\mu\text{g mL}^{-1}$ ) | 0.67 |
|                                                                           | 60 ( $\mu\text{g mL}^{-1}$ ) | 1.31 | 200 ( $\mu\text{g mL}^{-1}$ ) | 1.40 |
| Intra-day, RSD                                                            |                              |      |                               |      |
|                                                                           | 20 ( $\mu\text{g mL}^{-1}$ ) | 1.80 | 100 ( $\mu\text{g mL}^{-1}$ ) | 0.96 |
|                                                                           | 40 ( $\mu\text{g mL}^{-1}$ ) | 0.75 | 150 ( $\mu\text{g mL}^{-1}$ ) | 1.44 |
|                                                                           | 60 ( $\mu\text{g mL}^{-1}$ ) | 1.43 | 200 ( $\mu\text{g mL}^{-1}$ ) | 1.71 |

where SD is the mean of standard deviations of determinations in the lower range of linearity and  $a$  is the directional coefficient of the plotted linear function,  $S_a$  standard deviation of the slope,  $S_b$  standard deviation of the intercept,  $t$  calculated values of Student's  $t$  test,  $t_{\alpha, f} = 2.228$  critical values of Student's  $t$  test for degrees of freedom  $f = 10$  and significance level  $\alpha = 0.05$ .

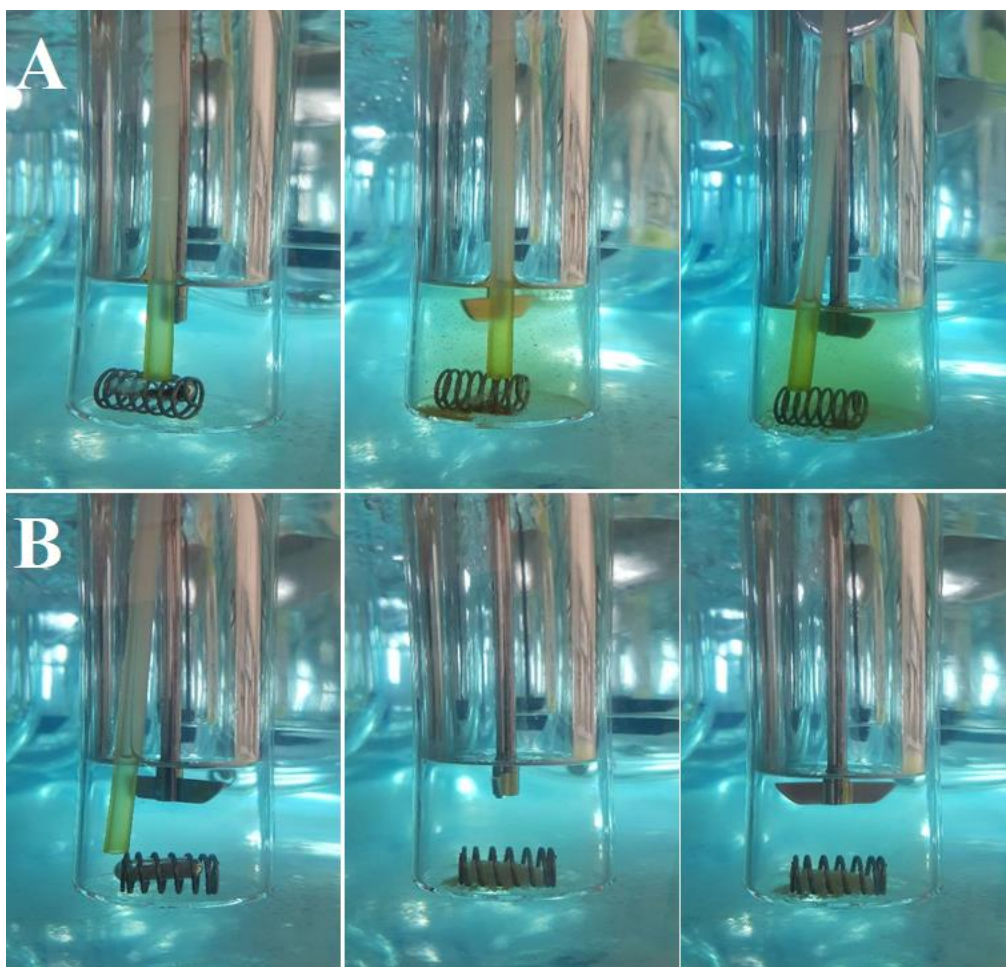

**Figure S1.** Dissolution studies of *Calendulae flos* lyophilized extract (A) and chitosan (80/500) delivery system with *Calendulae flos* lyophilized extract in weight ratio 1:1 (*w/w*) (B) in time 0 min, 30 min and 180 min by using a standard paddle Agilent 708-DS Dissolution Apparatus with a 150-mL phosphate buffer at pH 5.5 at  $32 \pm 0.5$  °C.

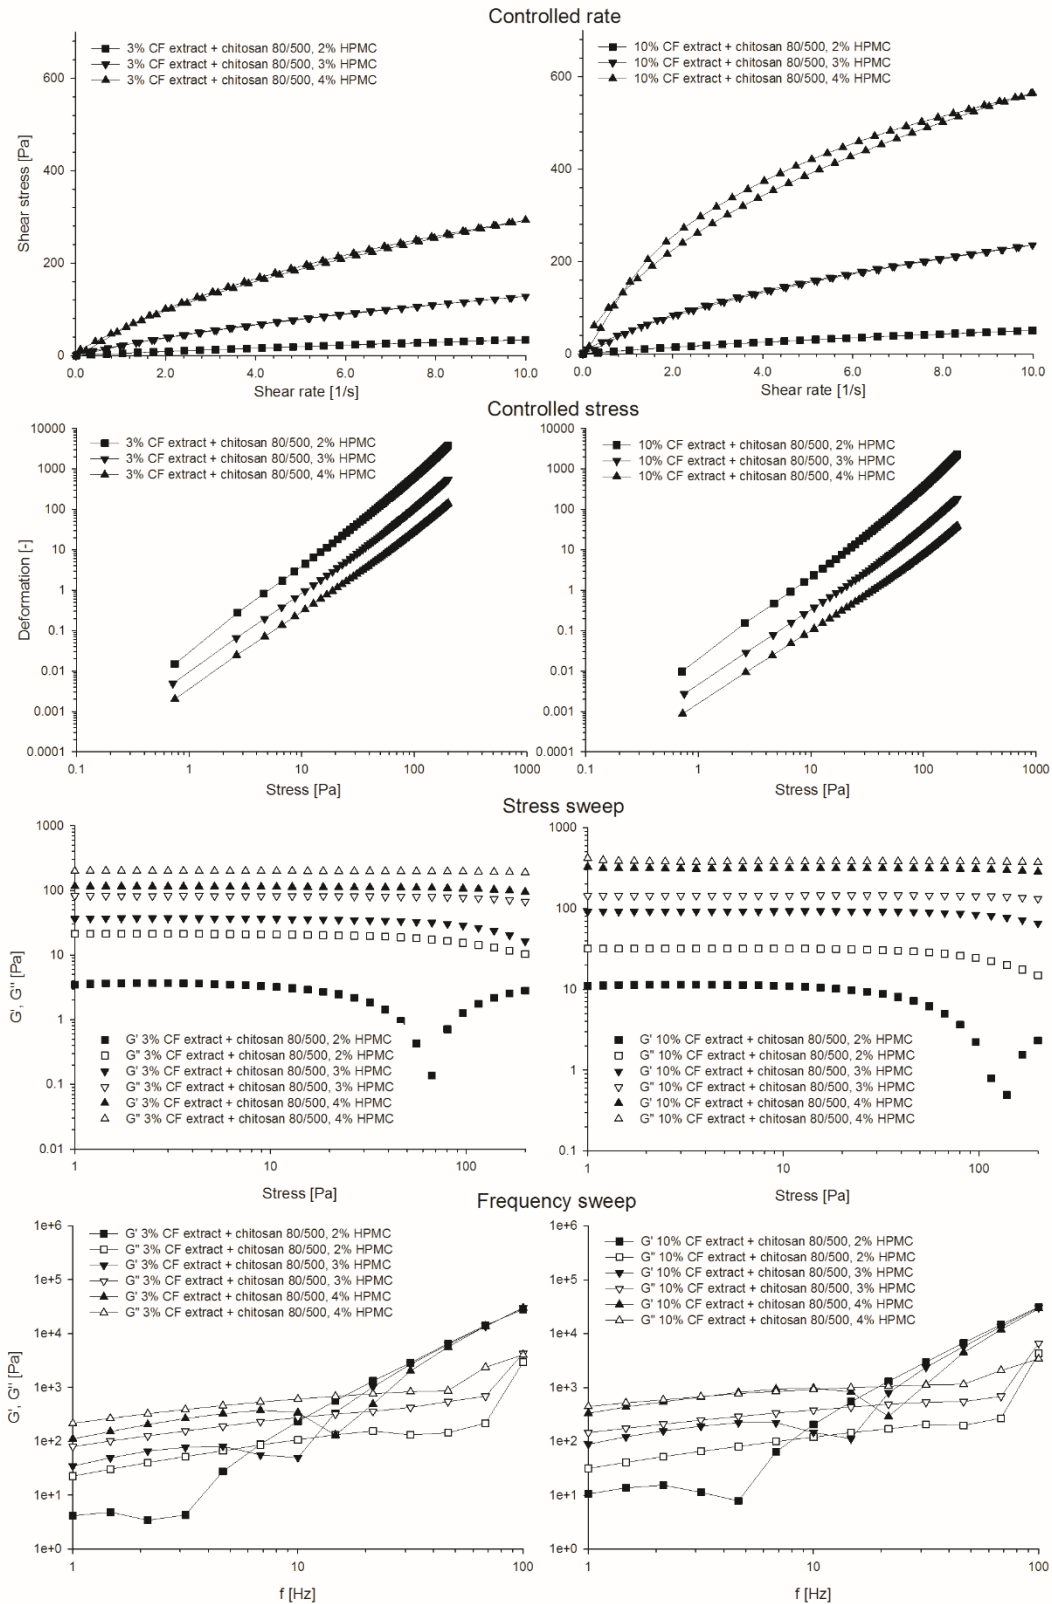

**Figure S2.** Rheological plots obtained for the hydrogel samples in steady shear tests (controlled rate and controlled stress) and oscillatory tests (stress and frequency sweep).
